# Supplementary material
Source: PubMed Central journal article supplement (PMC4316179)

**Figure S1. Curve fitting of experimental data.** Black curves represent the equation  $y = 1/x$  and are reporter together with the percentage of assigned reads at genus level for each bootstrap cutoff value of the RDP Classifier. Each plot reports the fitting obtained with one variable region type.

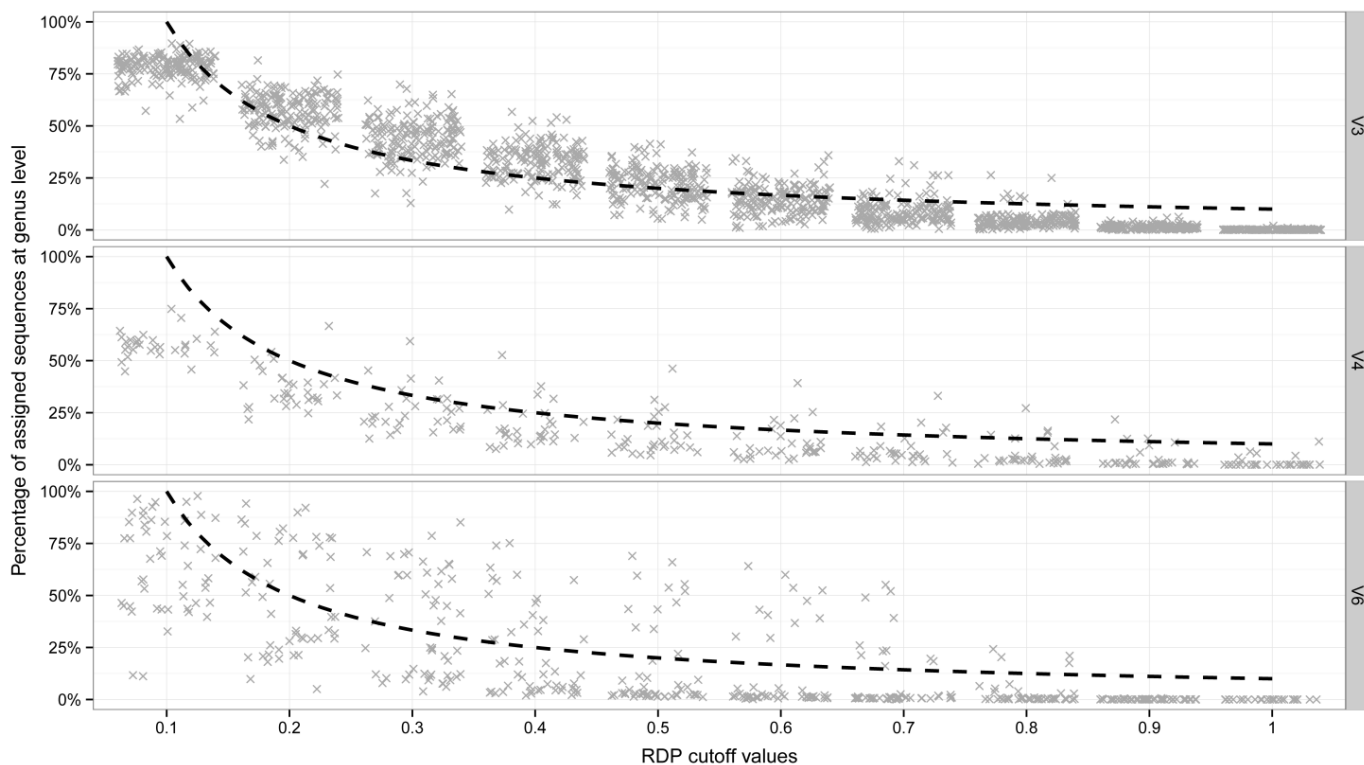

Supplement: jgenv03p0036s1.pdf [file jgenv03p0036s1.pdf]
